# Supplementary material for: Wearables for Measuring Health Effects of Climate Change–Induced Weather Extremes: Scoping Review
Source: JMIR Mhealth Uhealth. 2022 Sep 9;10(9):e39532. doi: 10.2196/39532 (PMC9508665; doi:10.2196/39532)
Supplement: Multimedia Appendix 3 [file mhealth_v10i9e39532_app3.docx]

Table S1. Information about the wearables.

| Study | Wearable(s) | Parameters measured with wearable(s) | | | | | | | | Wear location | | | | |
| --- | --- | --- | --- | --- | --- | --- | --- | --- | --- | --- | --- | --- | --- | --- |
|  |  | Heart rate (HR) | Physical activity | Energy expenditure | Skin temperature | Electrodermal activity | Sleep (onset, offset, duration) | Individually experienced temperature (IET) | Other* | Wristband | Chest strap | Taped to the skin | Clipped to shoe/belt/collar/bag/wristband | Other |
| Al-Bouwarthan et al. (2020) | Fitbit Flex (Fitbit, Inc.)  Polar RCX3 (Polar Electro Oy) | x | x | x |  |  |  |  |  | x | x |  |  |  |
| Al-Mohannadi et al. (2016) | Omron HJ-720 ITC pedometer (Omron Healthcare) |  | x |  |  |  |  |  |  |  |  |  |  | NA |
| AlSayed et al. (2017) | Polar H7 (connected to Polar M400) (Polar Electro Oy)  Hexoskin (Carre Technologies Inc.) | x |  |  |  |  |  |  |  | x | x |  |  | shirt |
| Bailey et al. (2019) | Thermochron iButton, Hygrochron iButton (Maxim Integrated)  HOBO Pendant (Onset Corp.) |  |  |  |  |  |  | x |  |  |  |  | x |  |
| Benita and Tuncer (2019), Benita et al. (2020) | Empatica E4 (Empatica Inc) |  |  |  | x | x |  |  |  | x |  |  |  |  |
| Benjamin et al. (2020) | Viper Pod (STATSports) | x | x |  |  |  |  |  | GPS |  | x |  |  |  |
| Bernhard et al. (2015) | HOBO Pendant (Onset Corp.) |  |  |  |  |  |  | x |  |  |  |  | x |  |
| Cedeño Laurent et al. (2018) | Basis Peak watch (Intel) | x |  |  |  |  | x |  |  | x |  |  |  |  |
| Cheong et al. (2020) | Fitbit Ionic (Fitbit, Inc.)  iButton (Maxim Integrated) | x | x |  | x |  |  | x |  | x |  |  | x |  |
| Cuddy et al. (2013) | Polar RS800CX (Polar Electro Oy) | x |  |  |  |  |  |  |  | x | x |  |  |  |
| Culp and Tonelli (2019) | Zephyr BioHarness (Medtronic) | x |  | x | x |  |  |  | RR |  | x |  |  |  |
| Edwards et al. (2015) | RT3 accelerometer (Stayhealthy) |  | x |  |  |  |  |  |  |  |  |  | x |  |
| Hamatani et al. (2017) | Microsoft Band (Microsoft) | x | x |  | x |  |  |  |  | x |  |  |  |  |
| Hass and Ellis (2019) | Hygrochron iButton (Maxim Integrated) |  |  |  |  |  |  | x |  |  |  |  | x | around the neck |
| Hondula et al. (2020) | Thermochron iButton (Maxim Integrated) |  |  |  |  |  |  | x |  |  |  |  | x |  |
| Ioannou et al. (2017) | iButton (Maxim Integrated) |  |  |  | x |  |  |  |  |  |  | x |  |  |
| Jehn et al. (2014) | accelerometer APM (Aipermon) |  | x |  |  |  |  |  |  |  |  |  | x |  |
| Kakamu et al. (2021) | LW-360HR (GISupply) | x |  | x | x |  |  |  |  | x |  |  |  |  |
| Ketko et al. (2014) | Polar heart watch (Polar RS800CX) (Polar Electro Oy) | x |  |  |  |  |  |  |  | x | x |  |  |  |
| Kim et al. (2013) | Zephyr BioHarness (Medtronic) | x |  |  |  |  |  |  | RR |  | x |  |  |  |
| Kuras et al. (2015) | Thermochron iButton (Maxim Integrated) |  |  |  |  |  |  | x |  |  |  |  | x |  |
| Lam et al. (2021) | Lifesense Mambo 2 (Lifesense)  iButton (Maxim Integrated) | x |  | x | x |  |  |  |  | x |  | x |  |  |
| Larose et al. (2014) | Polar WearLink coded (connected to Polar RS400) (Polar Electro Oy) | x |  |  |  |  |  |  |  | x | x |  |  |  |
| Lewis et al. (2016) | Actigraph GT3X+ (Actigraph LLc) |  | x |  |  |  |  |  |  |  |  |  | x |  |
| Li et al. (2020) | Polar RS800 (Polar Electro Oy) | x |  |  |  |  |  |  |  | x | x |  |  |  |
| Lisman et al. (2014) | Polar Team 2 Pro (Polar Electro Oy) | x |  |  |  |  |  |  |  |  | x |  |  |  |
| Longo et al. (2017) | Thermochron iButton (Maxim Integrated) |  |  |  |  |  |  | x |  |  |  |  | x |  |
| Lundgren et al. (2014) | Polar (model N/A) (Polar Electr Oy); LASCAR datalogger (EL-USB-2-LCD+) | x |  | x |  |  |  | x |  |  | x |  |  |  |
| MacLean et al. (2020) | iButton (Maxim Integrated)  Polar Team 2 (Polar Electro Oy) | x |  |  | x |  |  |  |  |  | x | x |  |  |
| Minor et al. (2020) | SmartBand Talk SWR30 and SWR12 (Sony) |  |  |  |  |  | x |  |  | x |  |  |  |  |
| Mitchell et al. (2018) | Actical (Philips Respironics) |  | x |  |  |  |  |  |  |  |  |  | x |  |
| Nazarian et al. (2021) | Fitbit Ionic (Fitbit, Inc.)  Hygrochron iButton, Thermochron iButton (Maxim Integrated)  Polar A300 (Polar Electro Oy) | x | x |  | x |  |  | x |  | x |  | x | x |  |
| Notley et al. (2021) | Polar M400 (Polar Electro Oy) | x |  |  |  |  |  |  |  |  | x |  |  |  |
| Ojha et al. (2020) | Empatica E4 (Empatica Inc) | x |  |  | x | x |  |  |  | x |  |  |  |  |
| Pancardo et al. (2015) | Zephyr Heart Rate Monitor (model N/A) (Medtronic) | x |  | x |  |  |  |  |  |  |  |  |  | NA |
| Quante et al. (2017) | Actigraph GT3X (Actigraph LLc) |  |  |  |  |  | x |  |  | x |  |  |  |  |
| Raval et al. (2018) | EasyLog Datalogger (EasyLog, USA) |  |  |  |  |  |  | x |  |  |  |  |  | around the neck |
| Ravanelli et al. (2015, 2016) | Polar RS 800 and Polar wearlink T31 coded (Polar Electro Oy) | x |  |  |  |  |  |  |  | x | x |  |  |  |
| Relf et al. (2018) | KuduSmart (Crossbridge Scientific Ltd.)  Polar FT1 (Polar Electro Oy) | x |  |  |  |  |  |  | LSR |  | x |  |  | upper arm |
| Relf et al. (2020) | KuduSmart (Crossbridge Scientific Ltd.)  Polar FT1 (Polar Electro Oy) | x |  |  |  |  |  |  | LSR |  | x |  |  | upper arm |
| Rosenthal et al. (2020) | Fitbit (various models) (Fitbit, Inc.) |  | x |  |  |  |  |  |  | x |  |  |  |  |
| Runkle et al. (2019), Sugg et al. (2018) | Thermochron iButton (Maxim Integrated)  Garmin Vivoactive HR (Garmin Ltd.) | x | x | x |  |  |  | x | GPS | x |  |  | x |  |
| Sahu et al. (2013) | Polar Accurex Plus (Polar Electro Oy) | x |  |  |  |  |  |  |  | x | x |  |  |  |
| Seo et al. (2016) | Zephyr BioHarness (Medtronic) | x |  |  |  |  |  |  | RR |  | x |  |  |  |
| Shakerian et al. (2021) | Empatica E4 (Empatica Inc) | x |  |  | x | x |  |  |  | x |  |  |  |  |
| Shin et al. (2015) | Actiwatch 2 (Philips Respironics); SenseWear Pro 3 (BodyMedia Inc) |  |  |  |  |  | x |  |  | x |  |  |  | upper arm |
| Suwei et al. (2019) | HOBO Pendant (Onset Corp.)  iButton (Maxim Integrated) |  |  |  |  |  |  | x |  |  |  |  | x |  |
| Uejio et al. (2018) | iButton (Maxim Integrated) |  |  |  |  |  |  | x |  |  |  |  | x |  |
| Van Hoye et al. (2014) | SenseWear Pro 3 (BodyMedia Inc)  Polar FT7 (Polar Electro Oy) | x |  | x | x | x |  | x |  |  | x |  |  | upper arm |
| Williams et al. (2019) | Basis Peak watch (Intel) | x | x |  |  | x |  |  |  | x |  |  |  |  |
| Xiong et al. (2020) | Fitbit Charge 2 (Fitbit, Inc.) |  |  |  |  |  | x |  |  | x |  |  |  |  |
| Zheng et al. (2019) | activPAL, activPAL3C (PAL Technologies) |  | x |  |  |  | x |  |  |  |  | x |  |  |
| Zhu et al. (2016) | Actiwatch 2 (Philips Respironics) |  | x |  |  |  | x |  |  | x |  |  |  |  |

*RR=respiratory rate, LSR=local sweat rate, GPS=global positioning system, NA=not applicable

Table S2. Information about the weather/climate measures.

| Study | Climate change-related weather extreme | Measured climate/weather parameter | | | | | Location where climate/weather data was obtained | | | | | |
| --- | --- | --- | --- | --- | --- | --- | --- | --- | --- | --- | --- | --- |
|  |  | Temperature | Relative humidity | Precipitation | Other* | Heat stress measure | Nearest weather station | Locally installed weather station | Sensors placed on site | Climatic chamber | Smartphone sensor | Satellite data |
| Al-Bouwarthan et al. (2020) | Heat |  |  |  |  | WBGT |  |  | x |  |  |  |
| Al-Mohannadi et al. (2016) | Heat (and precipitation) | x | x | x | x | WBGT | x |  |  |  |  |  |
| AlSayed et al. (2017) | Heat | x | x |  |  |  |  |  |  | x |  |  |
| Bailey et al. (2019) | Heat | x | x |  | x | HSI |  | x | x |  |  |  |
| Benita and Tuncer (2019), Benita et al. (2020) | Heat | x | x |  | x | WBGT,  HSI |  |  | x |  | x |  |
| Benjamin et al. (2020) | Heat | x | x |  |  | WBGT | x |  | x |  |  |  |
| Bernhard et al. (2015) | Heat | x |  |  |  |  | x |  |  |  |  |  |
| Cedeño Laurent et al. (2018) | Heat | x | x |  | x |  | x |  | x |  |  |  |
| Cheong et al. (2020) | Heat | x | x |  |  |  | x |  |  |  |  | x |
| Cuddy et al. (2013) | Heat | x | x |  |  |  |  |  |  | x |  |  |
| Culp and Tonelli (2019) | Heat |  |  |  |  | WBGT |  |  | x |  |  |  |
| Edwards et al. (2015) | Heat (and precipitation) | x |  | x | x | Heating/ cooling degrees (mean temp </> 65°F) | x |  |  |  |  |  |
| Hamatani et al. (2017) | Heat | x | x |  | x | Heat Stroke Index (using estimated core temp.) |  |  | x |  |  |  |
| Hass and Ellis (2019) | Heat | x | x |  |  | HSI | x |  |  |  |  |  |
| Hondula et al. (2020) | Heat | x |  |  |  |  | x |  |  |  |  |  |
| Ioannou et al. (2017) | Heat | x | x |  | x | UTCI | x | x |  |  |  |  |
| Jehn et al. (2014) | Heat | x | x |  | x |  | x |  |  |  |  |  |
| Kakamu et al. (2021) | Heat | x | x |  | x | WBGT,  heat stress days (Tmax≥25°C) |  |  | x |  |  |  |
| Ketko et al. (2014) | Heat | x | x |  |  |  |  |  |  | x |  |  |
| Kim et al. (2013) | Heat | x | x |  |  | HSI |  |  |  | x |  |  |
| Kuras et al. (2015) | Heat | x |  |  |  |  |  |  | x |  |  |  |
| Lam et al. (2021) | Heat | x | x |  |  | Physiological equivalent temperature (PET) |  |  | x |  |  |  |
| Larose et al. (2014) | Heat | x | x |  |  |  |  |  |  | x |  |  |
| Lewis et al. (2016) | Heat (and precipitation) | x | x | x | x | HSI | x |  |  |  |  |  |
| Li et al. (2020) | Heat | x | x |  |  |  |  |  |  | x |  |  |
| Lisman et al. (2014) | Heat | x | x |  |  |  |  |  |  | x |  |  |
| Longo et al. (2017) | Heat | x |  |  |  | Extreme heat degree minutes (EHDMs): temp. difference to 29°C | x |  |  |  |  |  |
| Lundgren et al. (2014) | Heat | x | x |  | x | Heat balance equation |  |  | x |  |  |  |
| MacLean et al. (2020) | Heat | x | x |  |  | WBGT |  |  |  | x |  |  |
| Minor et al. (2020) | Heat | x | x | x | x |  | x |  |  |  |  |  |
| Mitchell et al. (2018) | Heat |  |  |  |  | WBGT |  | x | x |  |  |  |
| Nazarian et al. (2021) | Heat | x | x |  |  | WBGT |  |  | x | x |  |  |
| Notley et al. (2021) | Heat | x | x |  |  | WBGT |  |  |  | x |  |  |
| Ojha et al. (2020) | Heat | x | x |  |  | Humidex |  |  |  | x |  |  |
| Pancardo et al. (2015) | Heat | x | x |  |  | WBGT |  |  |  |  | x |  |
| Quante et al. (2017) | Heat (and precipitation) | x |  | x | x |  | x |  |  |  |  |  |
| Raval et al. (2018) | Heat | x | x |  | x | WBGT | x |  | x |  |  |  |
| Ravanelli et al. (2015, 2016) | Heat | x | x |  |  |  |  |  |  | x |  |  |
| Relf et al. (2018) | Heat | x | x |  |  |  |  |  |  | x |  |  |
| Relf et al. (2020) | Heat | x | x |  |  |  |  |  |  | x |  |  |
| Rosenthal et al. (2020) | Wildfire |  |  |  | x |  | x |  |  |  |  |  |
| Runkle et al. (2019), Sugg et al. (2018) | Heat | x |  |  |  |  |  | x |  |  |  |  |
| Sahu et al. (2013) | Heat | x |  |  |  | WBGT |  |  | x |  |  |  |
| Seo et al. (2016) | Heat | x | x |  |  |  |  |  |  | x |  |  |
| Shakerian et al. (2021) | Heat | x | x |  |  | Humidex |  |  |  | x |  |  |
| Shin et al. (2015) | Heat | x |  |  |  |  |  |  |  | x |  |  |
| Suwei et al. (2019) | Heat | x |  |  | x | WBGT | x |  |  |  |  | x |
| Uejio et al. (2018) | Heat | x | x |  | x |  | x |  |  |  |  |  |
| Van Hoye et al. (2014) | Heat | x | x |  |  |  |  |  |  | x |  |  |
| Williams et al. (2019) | Heat | x | x |  | x |  | x |  | x |  |  |  |
| Xiong et al. (2020) | Heat | x | x |  | x |  |  |  | x |  |  |  |
| Zheng et al. (2019) | Heat (and precipitation) | x | x | x | x |  | x |  |  |  |  |  |
| Zhu et al. (2016) | Heat | x | x |  | x |  |  |  | x |  |  |  |

*Other includes: wind speed, wet bulb temperature, dry bulb temperature, dew point, mean radiant temperature, barometric pressure, visibility, CO2 concentration, air quality

Table S3.Correlation of wearables’ data and exposure to extreme weather.

| Association of heat and sleep | | |  |
| --- | --- | --- | --- |
| Study | Sleep parameter | Association | Further specification |
| Zhu et al. (2016) | Duration, efficiency, delayed onset | Negative Association | No association among participants in air-conditioned room |
| Xiong et al. (2020) | Efficiency, REM sleep percentage |  |
| Minor et al. (2020) | Duration, delayed onset | Greater for participants from lower income countries, females, older adults;  Short-term acclimatization |
| Cedeño Laurent et al. (2018) | Duration | Short-term acclimatization |
| Quante et al. (2019) | Duration, efficiency, midpoint time | In adolescents |
| Williams et al. (2019) | Disruptions | Positive association | In seniors |
| Shin et al. (2015) | Time awake during the night |  |
| Association of heat and physical activity | | |  |
| Study | Physical activity parameter | Association | Further specification |
| Al-Mohannadi et al. (2016) | Steps | Negative association | Greater association for females, higher age, participants from Eastern Mediterranean; negative association also for precipitation |
| Benjamin et al. (2020) | Percentage of high-speed running distance, high metabolic load distance | Aerobic fitness moderated the effect of WBGT on relative high-speed running distance (in female soccer players) |
| Jehn et al. (2014) | Steps | Worse symptoms for PAH and HI patients during heat stress |
| Edwards et al. (2015) | Moderate-vigorous physical activity, inactivity, total physical activity | Adjusted for age, sex, ethnicity, BMI, day length, wind speed precipitation; negative association also for precipitation |
| Lewis et al. (2016) | Moderate-vigorous physical activity, sedentary time, total physical activity | Maximum physical activity between 20-25°C; negative association also for precipitation |
| Zheng et al. (2019) | Moderate-vigorous physical activity | On weekdays; negative association also for precipitation |
| Quante et al. (2019) | Physical activity | Maximum physical activity at 20°C; negative association also for precipitation |
| Zheng et al. (2019) | Moderate-vigorous physical activity | Positive association | On weekends, positive association also for precipitation |
| Association of air quality during wildfires and physical activity | | | |
| Study | Physical activity parameter | Association | Further specification |
| Rosenthal et al. (2020) | Steps | Negative association |  |
| Association of heat and HR | | | |
| Study | Heart rate parameter | Association | Further specification |
| Al Sayed et al. (2017) | Mean HR | Positive association | In young, male adults |
| Larose et al. (2014) | HR | In middle-aged, older groups |
| Ravanelli et al. (2015, 2016) | HR | Electric fan use could significantly delay HR elevations |
| Cuddy et al. (2015) | HR | Significant difference between “at-risk” and “not at risk” group |
| Ketko et al. (2014) | HR | Significant higher HRs for “heat intolerant” participants |
| Lisman et al. (2014) | HR | BMI, percent body fat, sex and maximal oxygen uptake were associated with higher HR |
| Notley et al. (2021) | HR, heart rate reserve (HRR) | No significant difference between age groups, hypertension, and type 2 diabetes patients |
| Li et al. (2020) | HR | Null association |  |
| Ojha et al. (2020) | HR |  |
| Association of heat and other physical parameters | | | |
| Study | Physical parameter | Association | Further specification |
| Van Hoye et al. (2015) | Energy expenditure | Positive association | During high-intensity exercise |
| Ojha et al. (2020) | Electrodermal Activity,  skin temperature |  |
| Lam et al. (2021) | Metabolic rate (MR), HR | Significantly higher MRs for non-local students than local students; short-term acclimatization in second week |
| Benita et al. (2019, 2020) | Skin temperature, skin conductance response | Stress hotspots throughout the walking route of participants in the city |
| Cheong et al. (2020) | Skin temperature, anxiety level, HR | correlation between higher HR, near-body temperature, and outside temperature when participants reported mild anxiety |
| Occupational heat stress | | | |
| Study | Physical parameter | Association | Additional findings |
| Al-Bouwarthan et al. (2020) | Cardiovascular strain (HRR) | Positive association | heat stress exposure (HSE) was a stronger predictor of HRR than energy expenditure |
| Sahu et al. (2013) | Maximum HR, HR recovery |  |
| Culp et al. (2019) | HR, respiratory rate (RR), skin temperature | participants with higher BMIs had higher skin temperatures |
| Runkle et al. (2019), Sugg et al. (2018) | HR, IET | lower BMI, heat symptoms the week prior and the perception of heat as an occupational hazard were associated with lower heat strain risk while higher education, having a place to cool off and higher IET were associated with higher heat strain |
| Ioannou et al. (2017) | Skin temperature |  |
| Lundgren et al. (2014) | MR | Higher heat strain in females than males |
| Mitchell et al. (2018) | Physical activity | Negative association | female sex and higher age were independently associated with the minutes spent in moderate or high activity, whereas incentivized pay and multi-task work were positively associated with mean physical activity |
| Kakamu et al. (2021) | HR, EE, skin temperature | Null association |  |
